# Supplementary material
Source: PubMed Central journal article supplement (PMC3690855)
Supplement: 1221105110_pnas.201221105SI.pdf [file 1221105110_pnas.201221105SI.pdf]

# Supporting Information

Mbua et al. 10.1073/pnas.1221105110

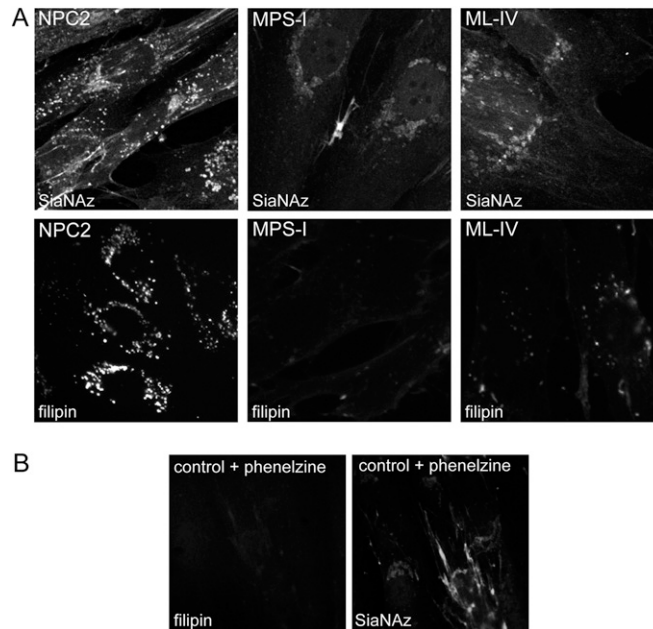

**Fig. S1.** (A) Vesicular *N*-azidoacetyl sialic acid (SiaNAz) staining is detected in Niemann–Pick type C (NPC) protein 2 (NPC2)-deficient fibroblasts, but not in mucopolysaccharidosis I (MPS-I) or mucopolipidosis IV (ML-IV) fibroblasts. NPC2-deficient, MPS-I, and ML-IV fibroblasts were cultured in the presence of peracetylated *N*- $\alpha$ -azidoacetylmannosamine ( $Ac_4$ ManNAz) for 48 h before incubation with dibenzylcyclooctynol (DIBO) and filipin. The filipin-stained cells were imaged by fluorescence microscopy, and the SiaNAz-stained cells were analyzed by confocal microscopy. Note the lack of vesicular SiaNAz staining and cholesterol storage in MPS-I and ML-IV cells.  $n = 75$ –85 cells analyzed; three independent experiments. (B) Unlike treatment with imipramine, treatment of control fibroblasts with another antidepressant, phenelzine, did not result in cholesterol storage or vesicular accumulation of sialylated molecules.

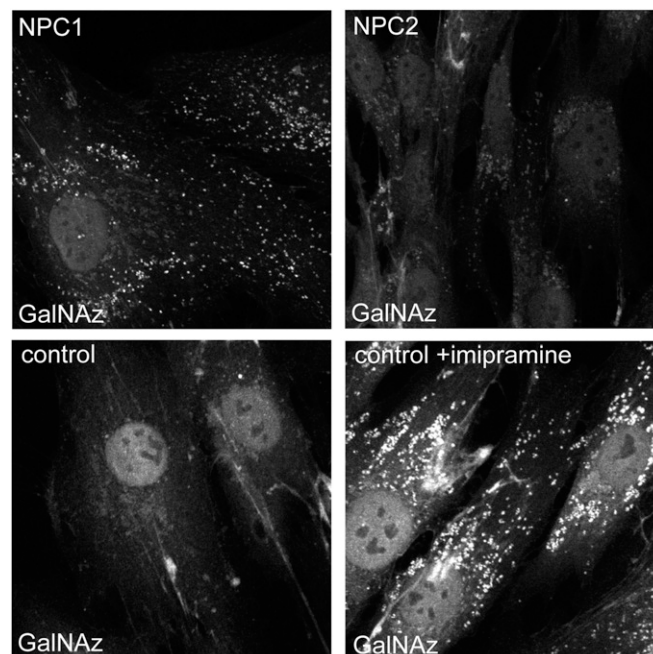

**Fig. S2.** Vesicular *N*- $\alpha$ -azidoacetylgalactosamine (GalNAz) staining is detected in NPC protein 1 (NPC1)-null, NPC2-deficient, and imipramine-treated control fibroblasts. Fibroblast cultures were labeled in the presence of peracetylated GalNAz ( $Ac_4$ GalNAz) for 48 h before incubation with DIBO. Stained cells were imaged by confocal microscopy.  $n = 20$ –27 cells analyzed; three independent experiments.

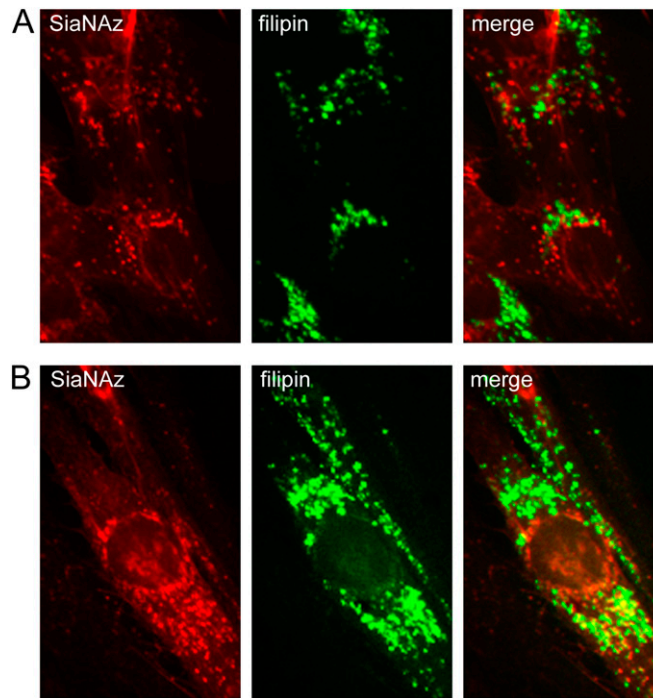

**Fig. S3.** Colocalization of cholesterol and SiaNAz in NPC2-deficient fibroblasts and imipramine-treated control fibroblasts. (A) NPC2-deficient fibroblasts and (B) imipramine-treated control fibroblasts were labeled with  $Ac_4ManNAz$  for 48 h, incubated with DIBO and Alexa Fluor 568 (to label sialylated molecules) and filipin (to label cholesterol), and prepared for imaging as described in *Materials and Methods* Staining was visualized by epifluorescence microscopy.  $n = 30-35$  cells analyzed. Note the lack of colocalization in the NPC2-deficient fibroblasts between cholesterol and SiaNAz. In contrast, imipramine treatment of control cells results in accumulation of cholesterol and SiaNAz within common compartments.



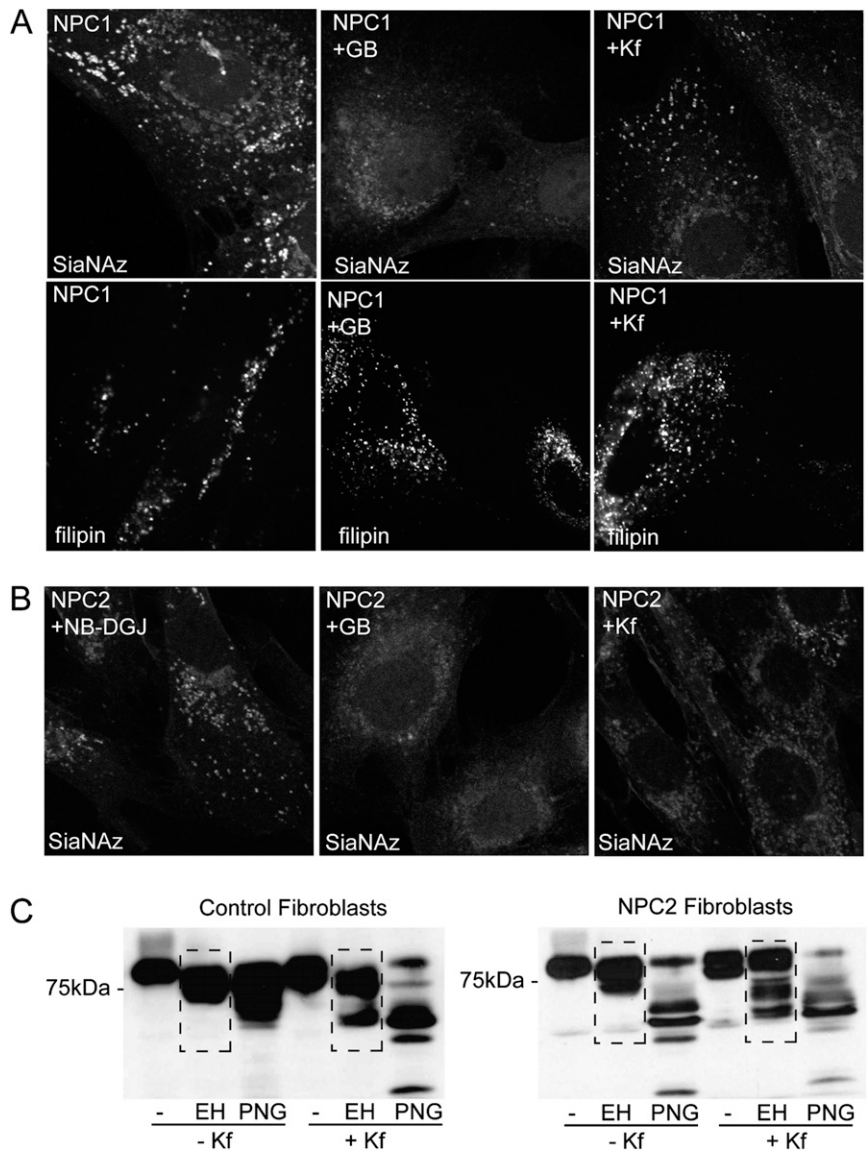

**Fig. S5.** Inhibitors of glycoprotein glycosylation reduce the SiaNAz phenotype in NPC fibroblasts. (A and B) NPC1-null (A) and NPC2-deficient (B) cells were labeled with Ac<sub>4</sub>ManNAz for 2 d in the absence or presence of the inhibitors benzyl- $\alpha$ -GalNAc (GB; 2 mM) and kifunensine (Kf; 10  $\mu$ M). (Upper) Treated and nontreated NPC fibroblasts were incubated with DIBO (30  $\mu$ M) for 1 h at room temperature, followed by streptavidin-conjugated fluorophore (SiaNAz). (Lower) Filipin staining of the same cells under the same conditions. Treatment of NPC fibroblasts with inhibitors of glycoprotein biosynthesis led to a reduction of accumulated sialylated molecules. *n* = 20–25 cells analyzed; three independent experiments. No reduction in filipin staining was observed with either treatment. (C) Control and NPC2-deficient fibroblasts were treated with and without Kf (10  $\mu$ M) for 2 d. Equivalent amounts of detergent cell lysate were subjected to digestion with either Endo H (EH; which removes unprocessed, high mannose-type *N*-glycans) or PNGase F (PNG; which removes all *N*-glycans), and then resolved by SDS/PAGE. After transfer, blots were probed with a polyclonal antibody against the lysosomal glycoprotein lysosomal integral membrane protein 2 (LIMP2). Boxes highlight the loss of *N*-glycan processing in both control and NPC2-deficient fibroblasts treated with Kf.
